# Supplementary material for: The influence of climate variability on transatlantic flight times
Source: Copernicus journal article supplement (doi:10.5194/egusphere-2025-1045), 2025-04-08
Supplement: Supplementary file 1 [file egusphere-2025-1045-supplement.pdf]

# **Supplement to “Quantifying the role of climate processes in trans-Atlantic flight times using IAGOS data”**

**Corwin J. Wright**

[illegible]

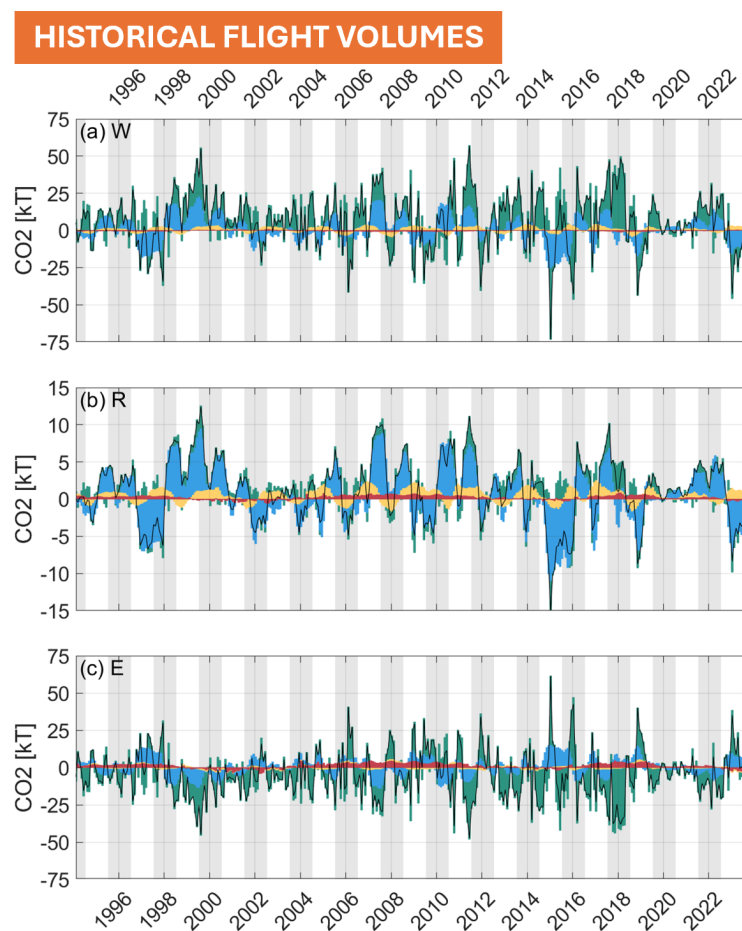

**Figure S 1.** Estimated monthly costs due to climate-index-associated delays from June 1994 to March 2024, in kilotonnes of CO<sub>2</sub> for (a) westwards (b) round-trip (c) eastwards flights at real historical flight volumes. Data are shown as stacked histograms, i.e. the total effect due to a specific index is the difference between that and the next index in the direction of the zero axis. Indices have been ordered for this process such that the slowest-varying (TSI) is closest to the axis and the fastest-varying (NAO) is furthest from the axis. A thin black line shows the net cost summed over all indices for each month.

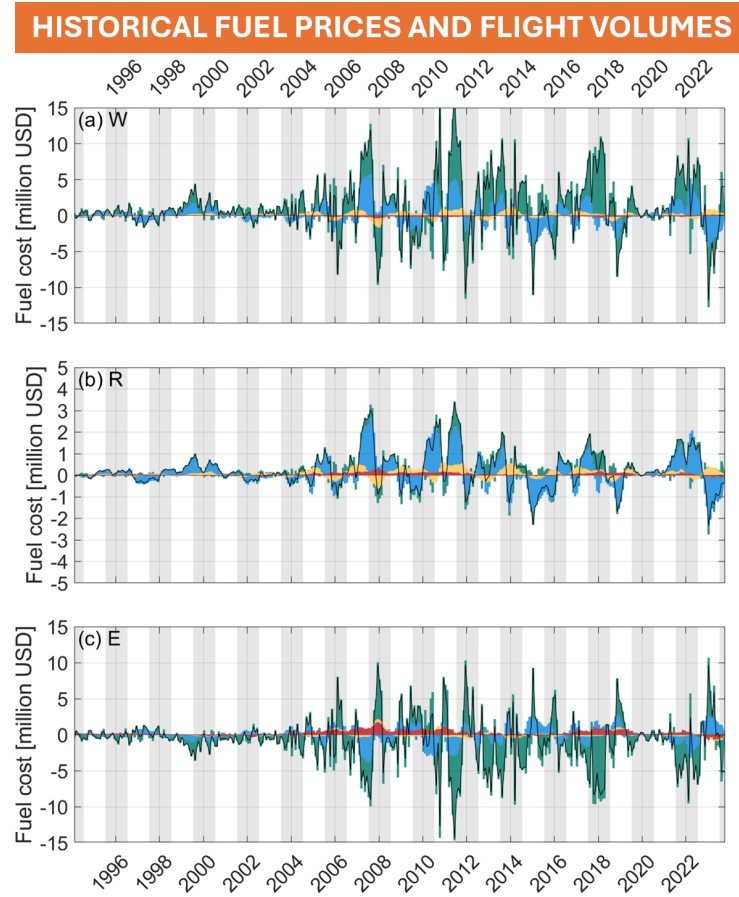

**Figure S 2.** Estimated monthly costs due to climate-index-associated delays from June 1994 to March 2024, in millions of US dollars for (a) westwards (b) round-trip (c) eastwards flights at real historical flight volumes and fuel prices. Data are shown as stacked histograms, i.e. the total effect due to a specific index is the difference between that and the next index in the direction of the zero axis. Indices have been ordered for this process such that the slowest-varying (TSI) is closest to the axis and the fastest-varying (NAO) is furthest from the axis. A thin black line shows the net cost summed over all indices for each month.

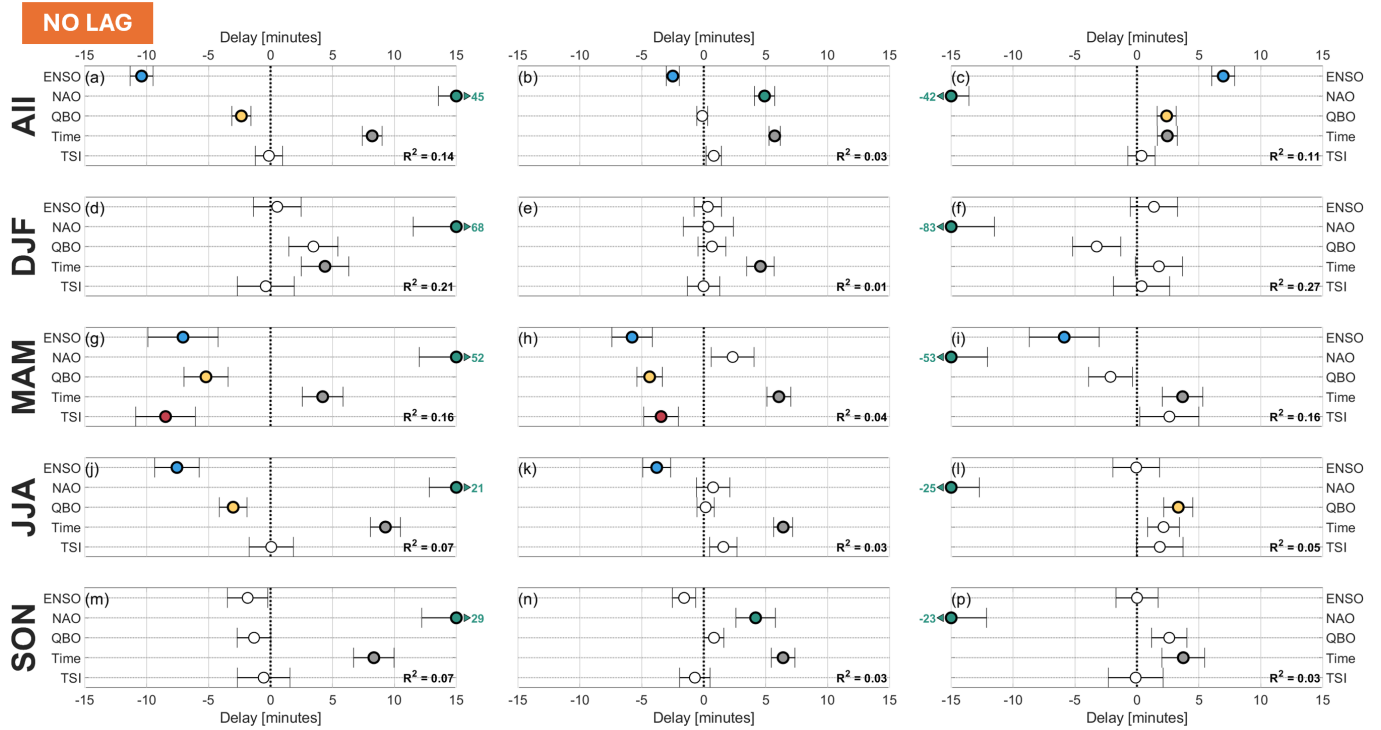

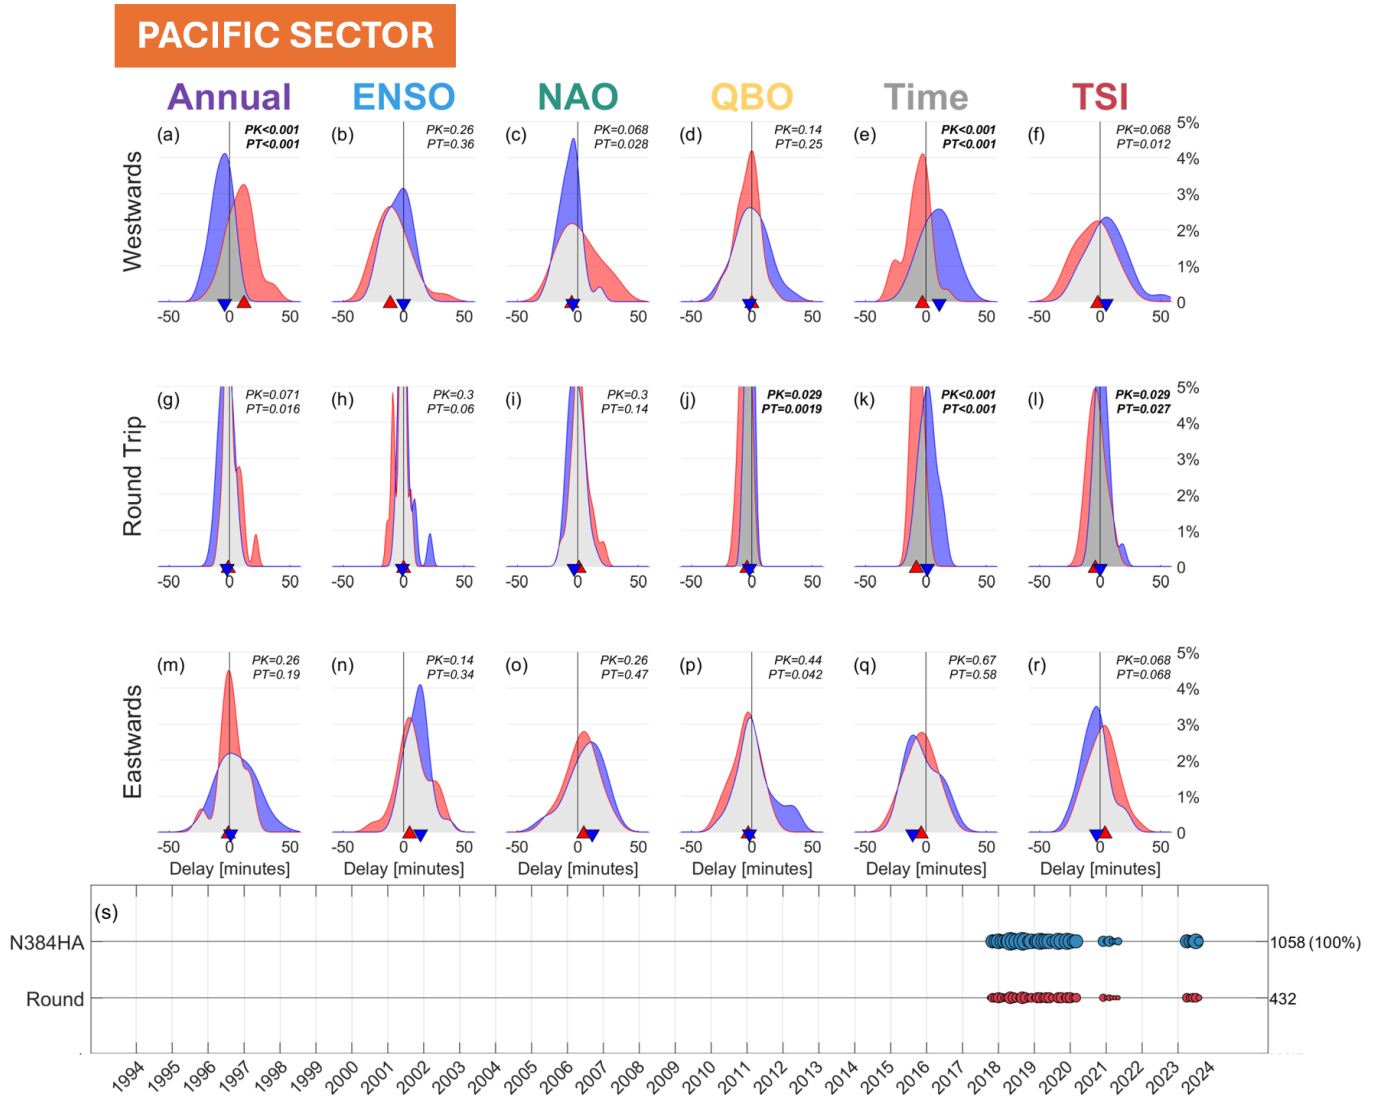

**Figure S 4.** (a-r) Kernel density functions (KDFs) for the top (red) and bottom (blue) 20% of flights by each index between Honolulu and the US West Coast. KDFs are shown for flights in the (a-f) westwards and (m-r) eastwards directions and for (g-l) composite round trips. Columns from left to right show results split on the basis of (a,g,m) Annual, (b,h,n) ENSO, (c,i,o) NAO, (d,j,p) QBO, (e,k,q) Time and (f,l,r) TSI indices. Overlap between the two KDFs are shown in dark grey if the difference between the two KDFs is statistically significant at the 5% level on a two-sample Kolmogorov-Smirnov test and light grey otherwise, with the numeric K-S test result shown at top right marked as ‘PK’. The results of a two-sampled  $t$ -test are also shown, marked as ‘PT’. Triangle markers on the horizontal axis indicate the median value in each subset of the data, using the same red/blue colour coding. (s) Number of flights per month in the dataset. Each row represents an individual plane, identified by tail number at far left, with bubble sizes showing total flights by that plane each month, summed at right. The bottom dataset, labelled ‘round’, is the number of round trips each month as defined in the main manuscript.
